# Supplementary material for: RAS specific protease induces irreversible growth arrest via p27 in several KRAS mutant colorectal cancer cell lines
Source: PubMed Central journal article supplement (PMC8429734; doi:10.1038/s41598-021-97422-0), 2021-09-09
Supplement: 41598_2021_97422_MOESM1_ESM.pdf [file 41598_2021_97422_MOESM1_ESM.pdf]

**RAS specific protease Induces Irreversible Growth Arrest via p27 in several KRAS Mutant  
Colorectal Cancer cell lines**

Caleb K. Stubbs, Marco Biancucci\*, Vania Vidimar\*, Karla J. F. Satchell†

Department of Microbiology and Immunology, Northwestern University, Feinberg School of  
Medicine, Chicago, Illinois.

\*Present addresses: M.B., GSK Vaccines, Rockville, MD 20850, USA; V.V., Merck Research  
Laboratories, Boston, MA 02115

†**Corresponding author:** Karla Satchell, Northwestern University, Feinberg School of Medicine,  
Chicago, IL 60611, USA. Email: [k-satchell@northwestern.edu](mailto:k-satchell@northwestern.edu)

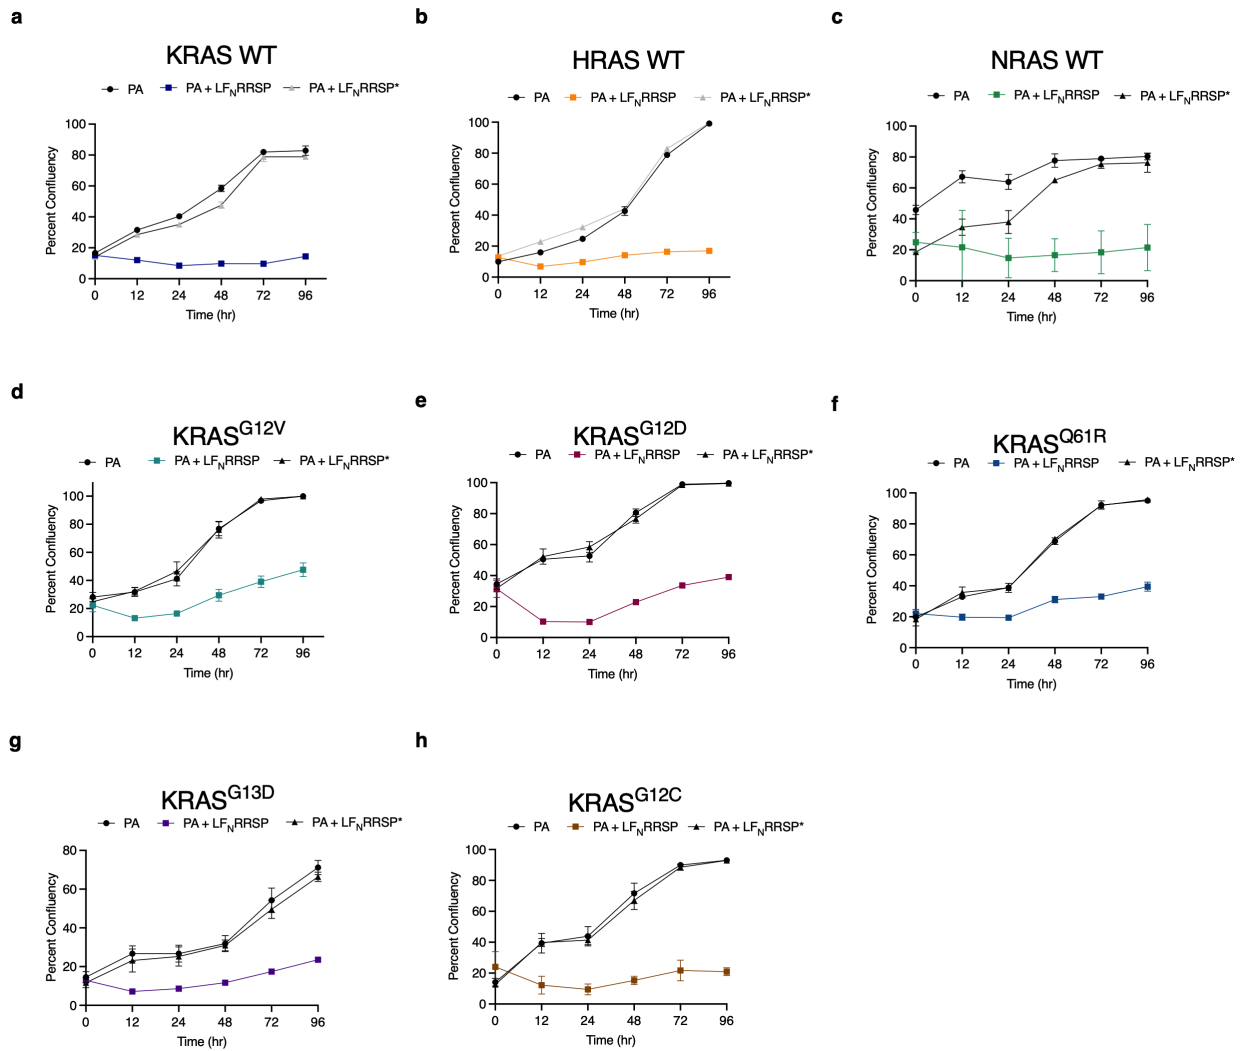

**Supplementary Figure 1.** Growth inhibition of RAS-less MEFs cell lines. (A-H) Growth inhibition observed in of RAS-less MEF cell lines at indicted timepoints following treatment with PA alone or in combination with LF<sub>N</sub>RRSP or LF<sub>N</sub>RRSP\*; *n* = 3. Results are expressed as ± SEM.

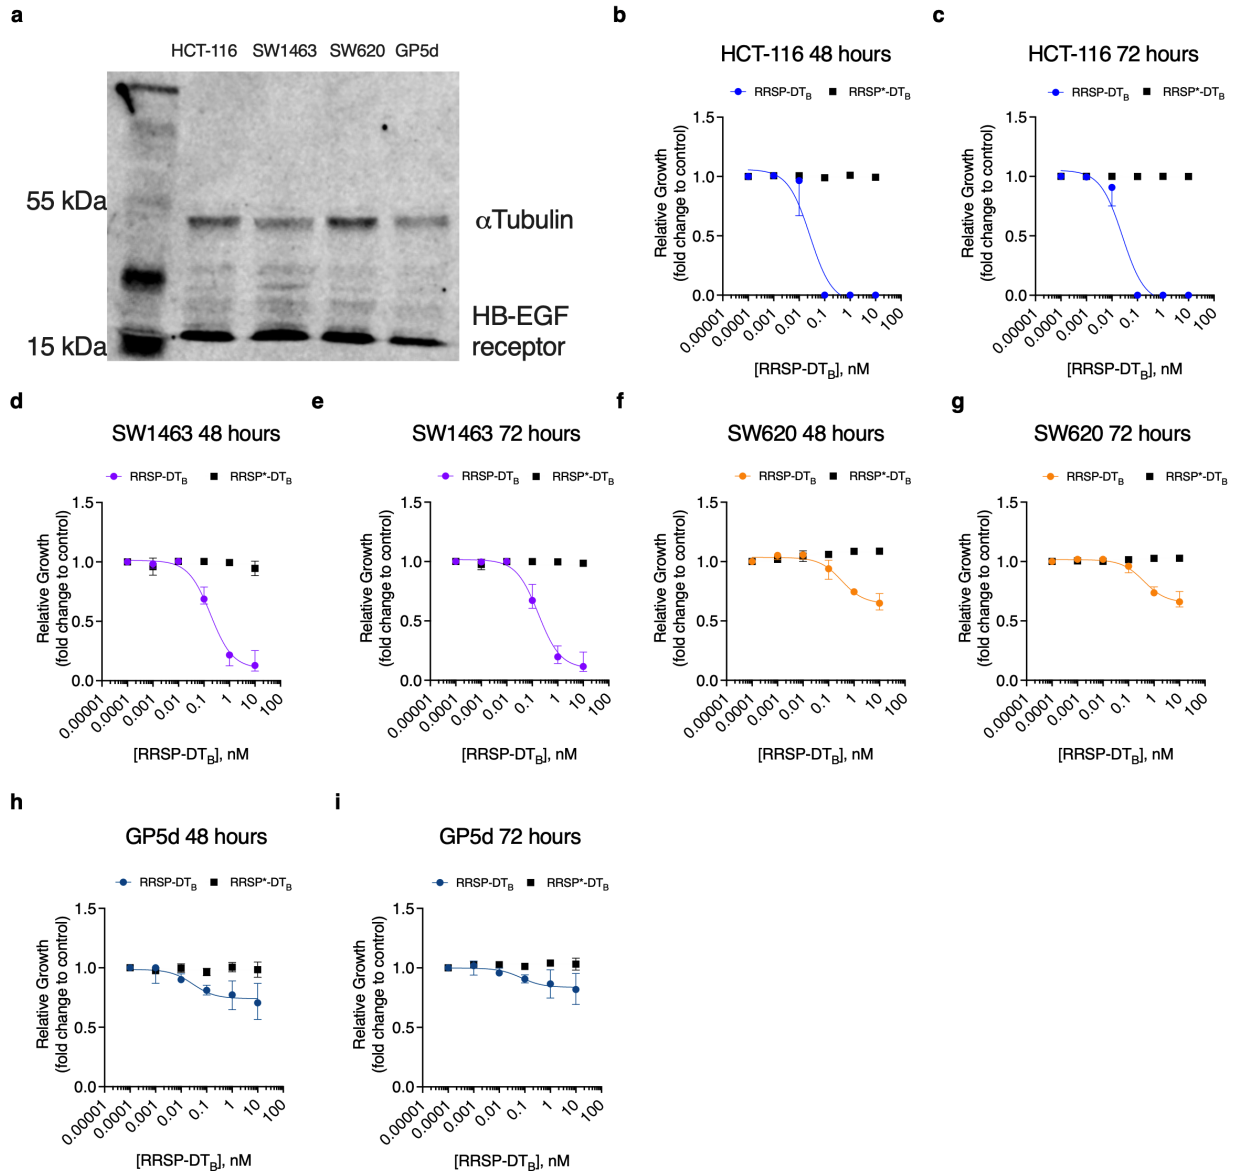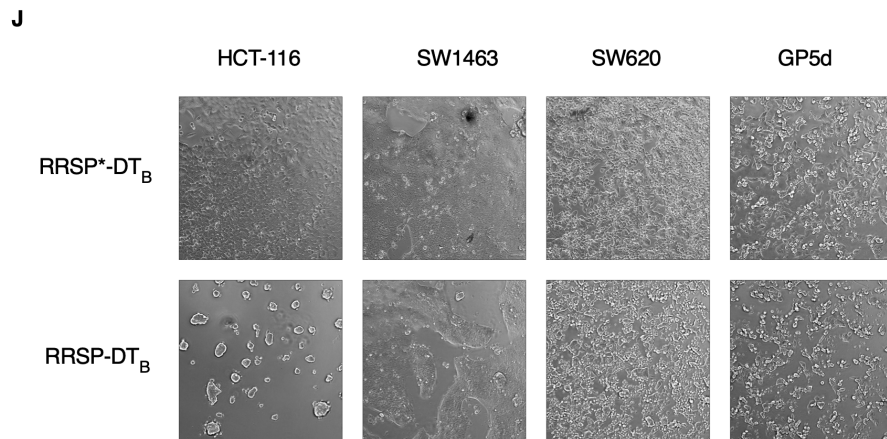

**Supplementary Figure 2.** Growth inhibition in RRSP-DT<sub>B</sub> treated CRC cell lines. **(A)**. Western blot analysis of HB-EGF receptor (DT receptor) from untreated CRC cell line lysates. Vinculin was used as loading control. **(B-I)** Cell growth over time was monitored by time lapse video microscopy and quantified using Nikon Elements to calculate cell confluency. Fitted dose response curve of RRSP-DT<sub>B</sub> in CRC cell lines show relative confluency compared to PBS values after 48 and 72 hours. Results are displayed as mean  $\pm$  SEM,  $n = 4$ . **(J)** Representative brightfield images of CRC cell lines treated with either RRSP-DT<sub>B</sub> or RRSP\*-DT<sub>B</sub> (0.1 nM) after 24 hours.



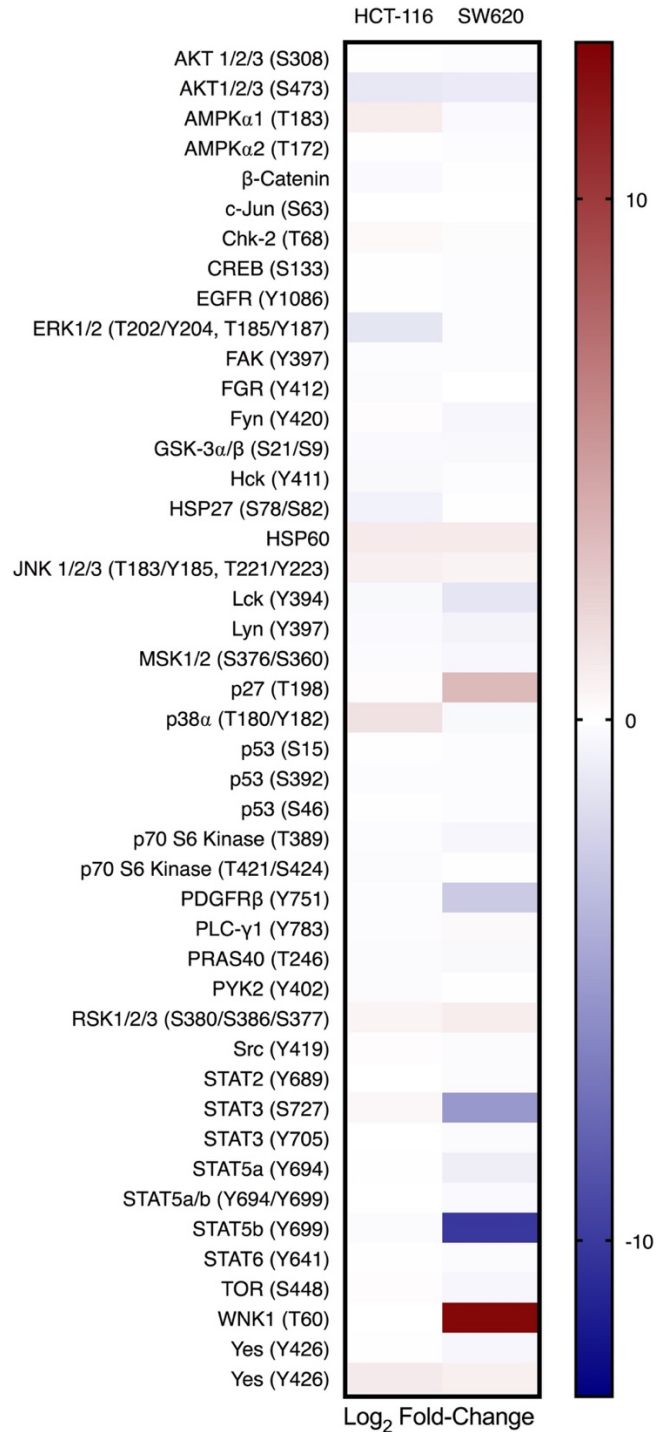

**Supplementary Figure 3.** Heatmap of human phospho-kinase array in HCT-116 and SW620 cells treated RRSP-DT<sub>B</sub> treated samples. Densitometric analysis of phospho-kinase array depicted through a heatmap of relative phosphorylated proteins levels in response to 10 nM RRSP-DT<sub>B</sub> compared to PBS control in HCT-116 and SW620 cells after 24 hr.

a

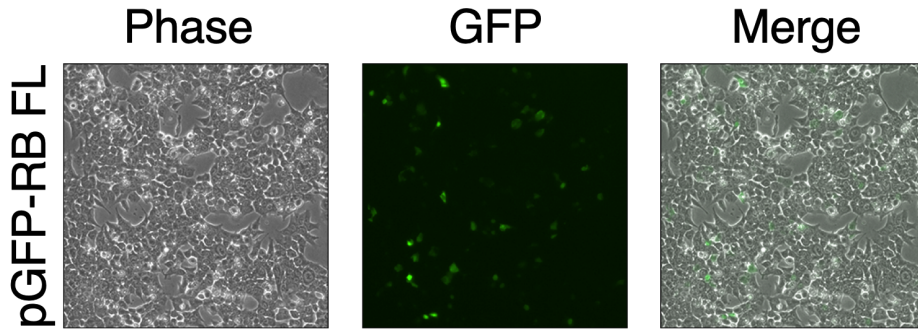

b

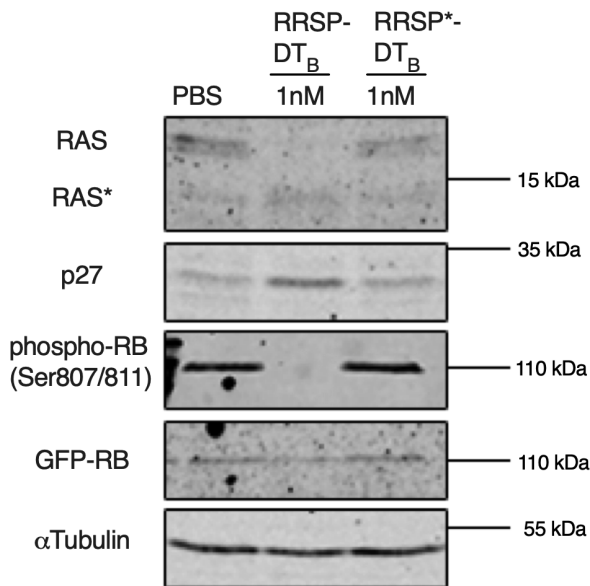

c

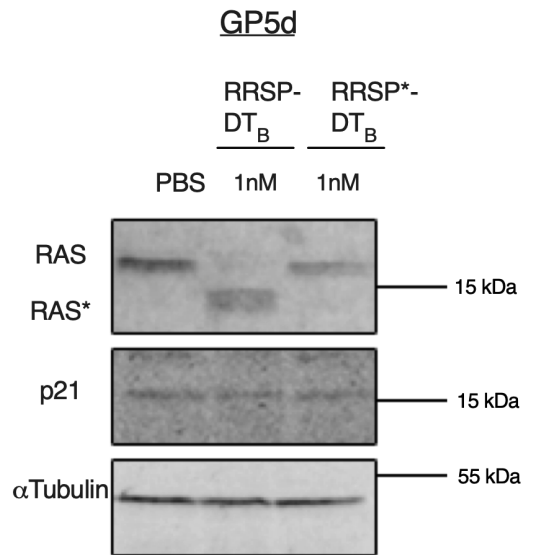

**Supplementary Figure 4.** Total RB expression in CRC cell lines. **(A)** Representative images of HCT-116 cells transfected with pGFP-RB after 24 hr **(B)** Western blot analysis of HCT-116 cells transfected with GFP tagged RB following treatment with either PBS, RRSP-DT<sub>B</sub> or RRSP\*-DT<sub>B</sub> after 24 hours. Total RB was detected using anti-GFP primary antibody. αTubulin was used as a gel loading control. **(C)** Western blot analysis of p21 levels in GP5d cell treated with either PBS, RRSP-DT<sub>B</sub> or RRSP\*-DT<sub>B</sub> after 24 hr.

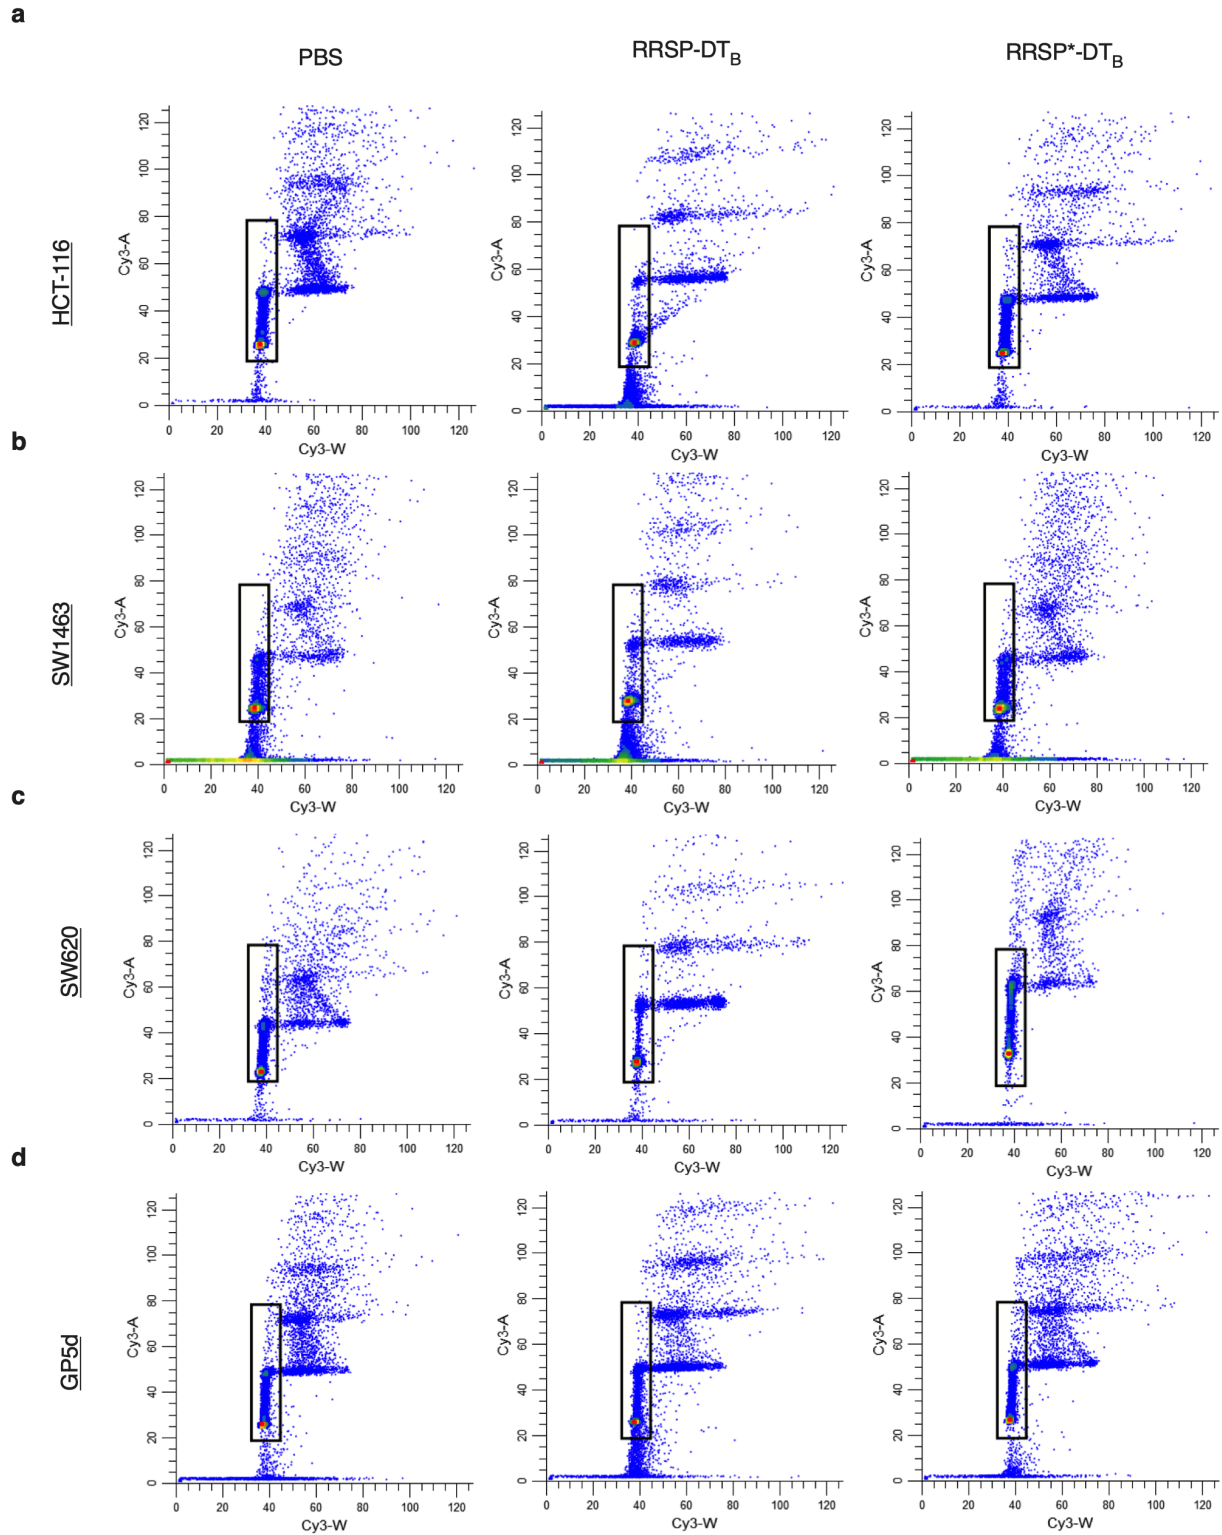

**Supplementary Figure 5.** Cell cycle analysis of CRC cell lines treated RRSP-DT<sub>B</sub>. (A-D) Representative flow cytometry plots of CRC cell lines treated with either PBS, RRSP-DT<sub>B</sub> or RRSP\*-DT<sub>B</sub> (1 nM) after 24 hours. Gating parameters were used to only collect single live cell populations.

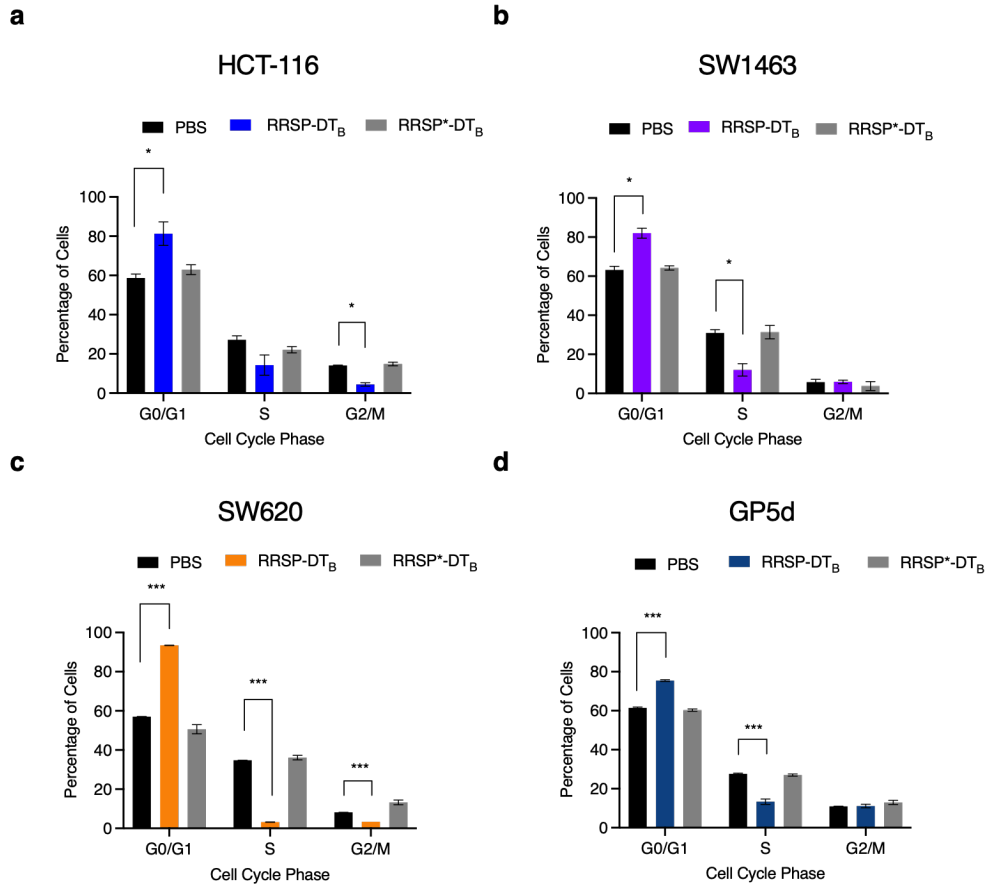

**Supplementary Figure 6.** Cell cycle analysis of RRSP-DT<sub>B</sub> treated CRC cell lines. (A-D) Quantitative analysis of cell cycle analysis of CRC cell lines treated with PBS, 1 nM RRSP-DT<sub>B</sub> or 1 nM RRSP\*-DT<sub>B</sub> for 24 hours;  $n = 3$ . Results are expressed as means  $\pm$  SEM of three independent experiments (\* $P < 0.05$ , \*\* $P < 0.01$ , \*\*\*\* $P < 0.0001$  versus PA control as determined through one-way ANOVA followed by Dunnett's multiple comparison test).

**a**

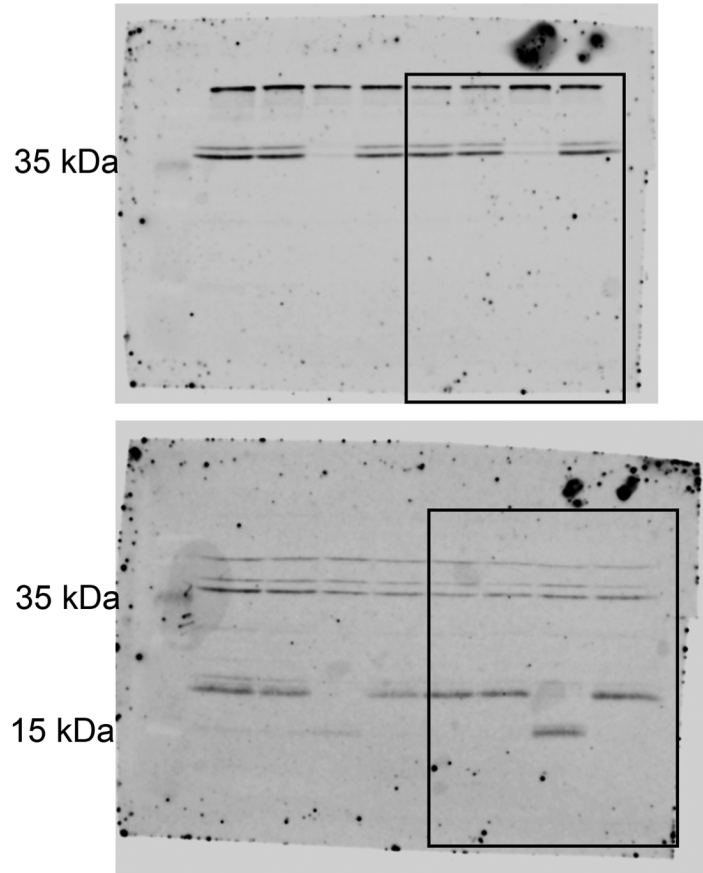

**Supplementary Figure 7.** Uncropped immunoblots for Fig 1A (A). Lanes from main figure are shown within rectangle. Membrane was stripped and reprobbed for target proteins sharing similar molecular weights.

**a**

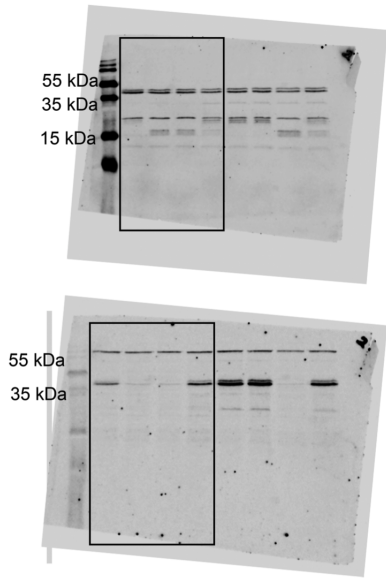

**b**

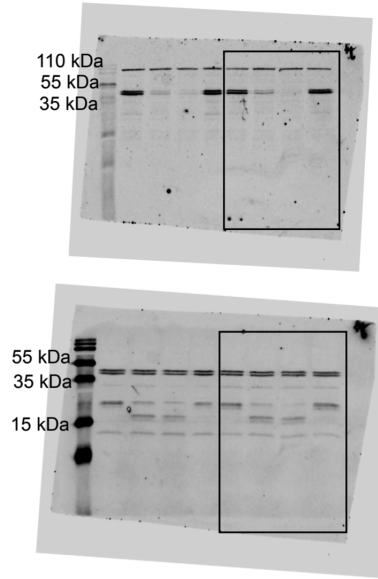

**c**

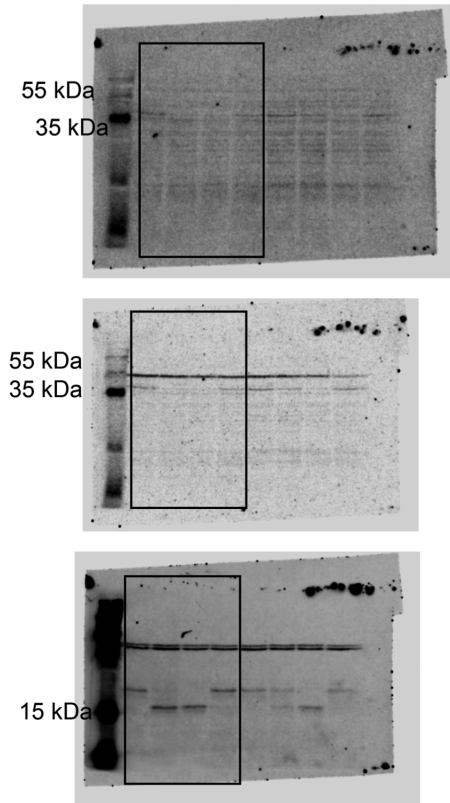

**d**

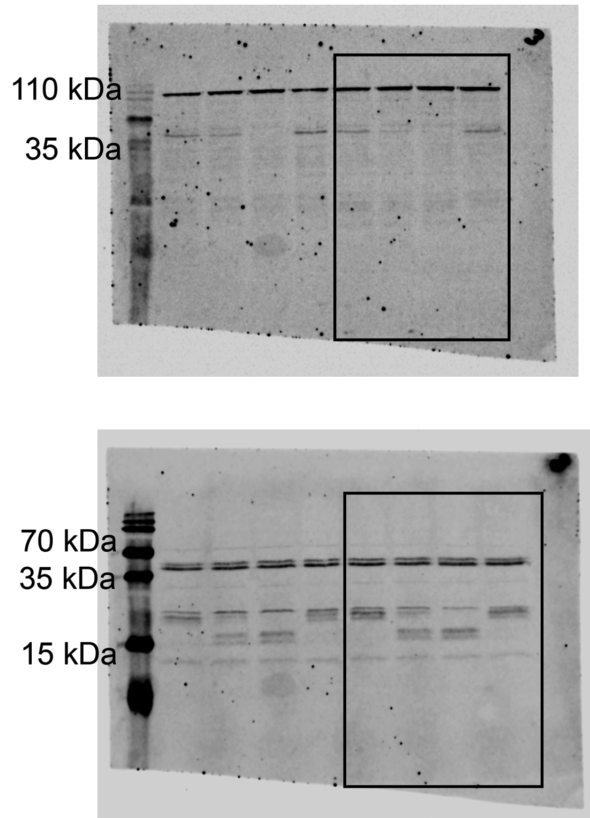

**Supplementary Figure 8.** Uncropped immunoblots for Fig 2F (A-D); (A) HCT-116 (B) SW1463 (C) SW620 (D) GP5d. Lanes from main figure are shown within rectangle. Membrane was stripped and reprobed for target proteins sharing similar molecular weights.

**a**

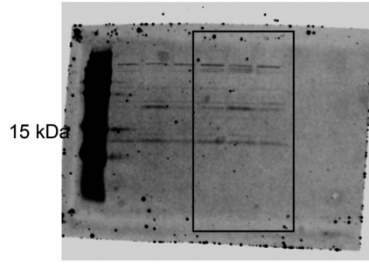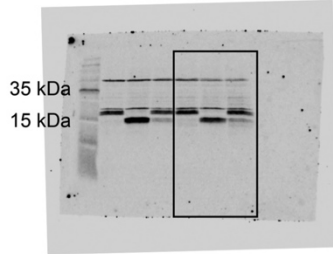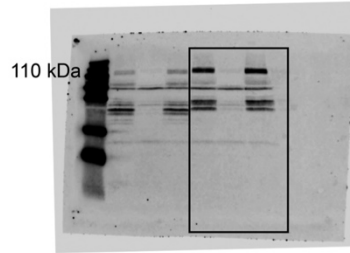

**b**

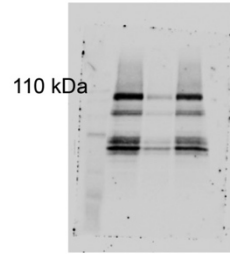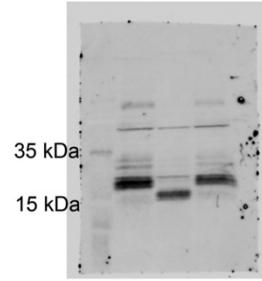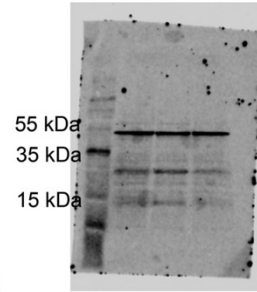

**c**

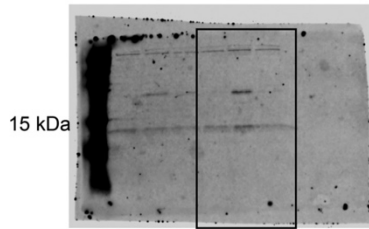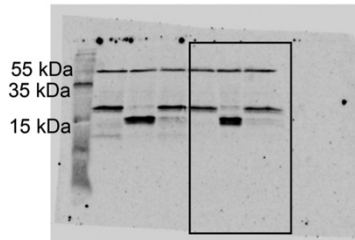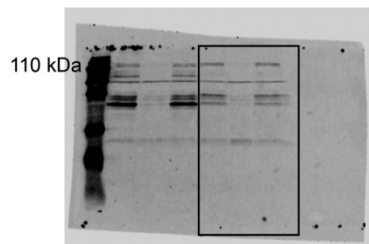

**d**

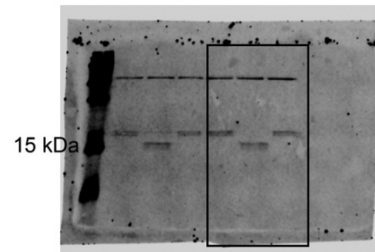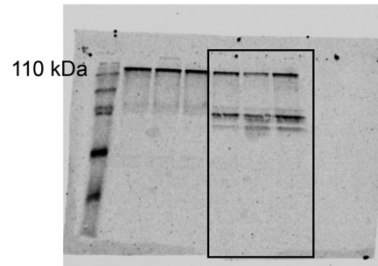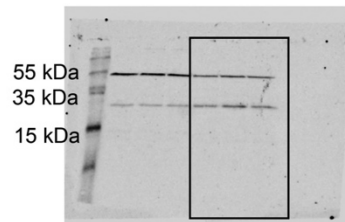



**Supplementary Figure 9.** Uncropped immunoblots for Fig 4C (A-D); (A) HCT-116 (B) SW1463 (C) SW620 (D) GP5d. Lanes from main figure are shown within rectangle. Membrane was stripped and reprobbed for target proteins sharing similar molecular weights.

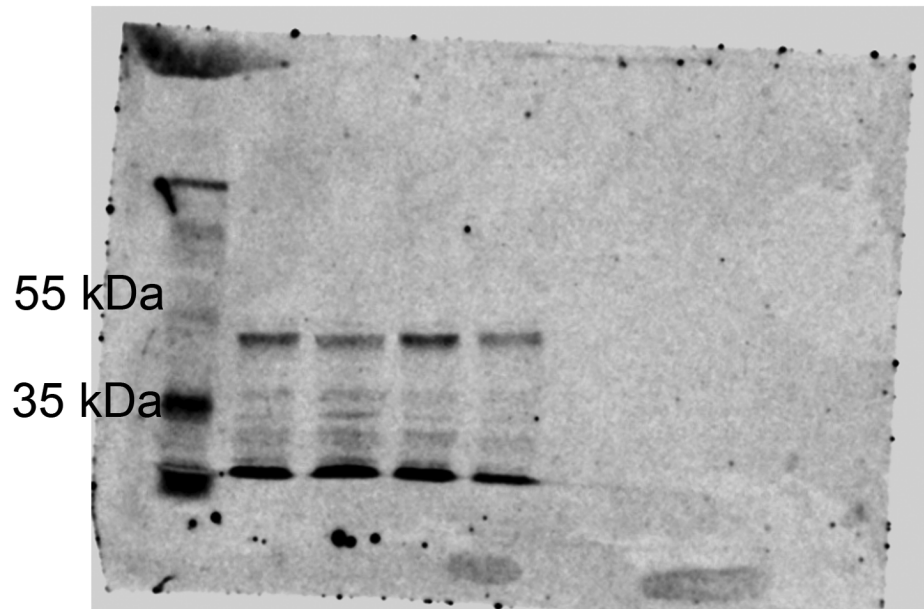

**Supplementary Figure 10.** Uncropped immunoblots for Supplementary Fig 2A. Lane 2: HCT-116. Lane 3: SW1463. Lane 4: SW620. Lane 5: GP5d.

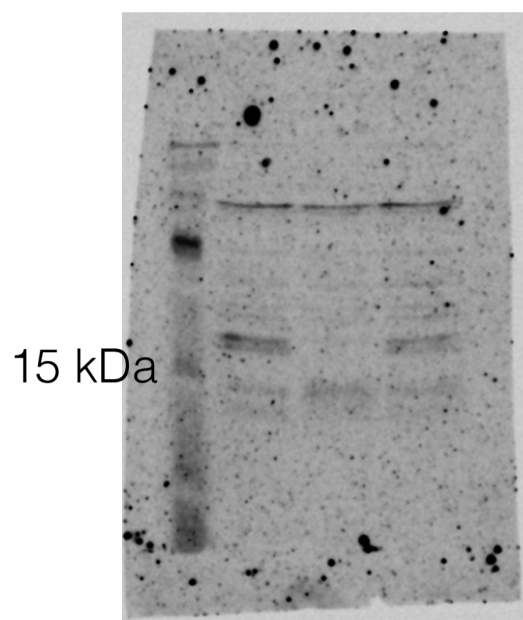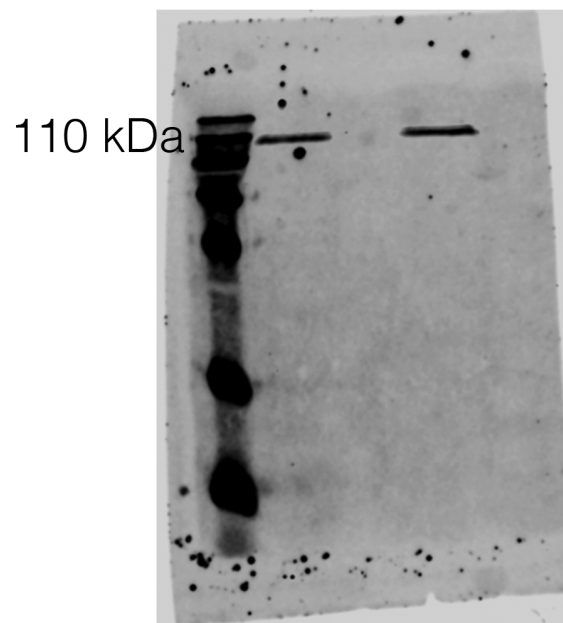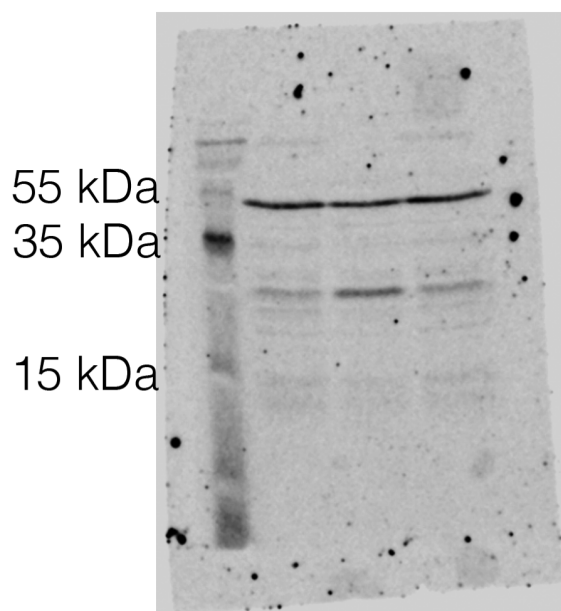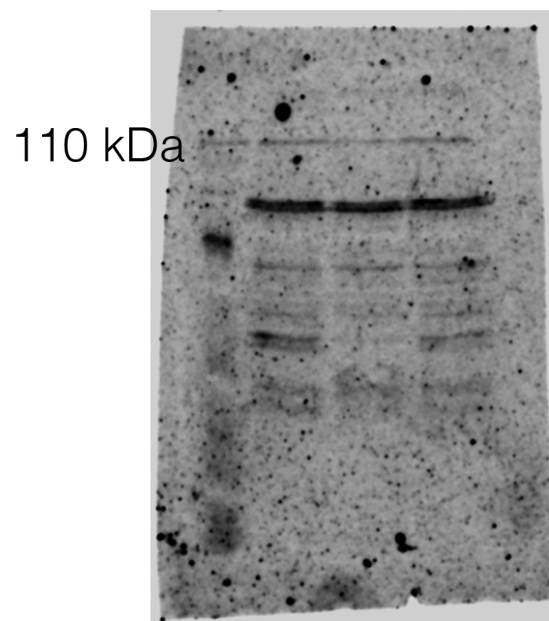

**Supplementary Figure 11.** Uncropped immunoblots for Supplementary Fig 4B. Membrane was stripped and reprobbed for target proteins sharing similar molecular weights.

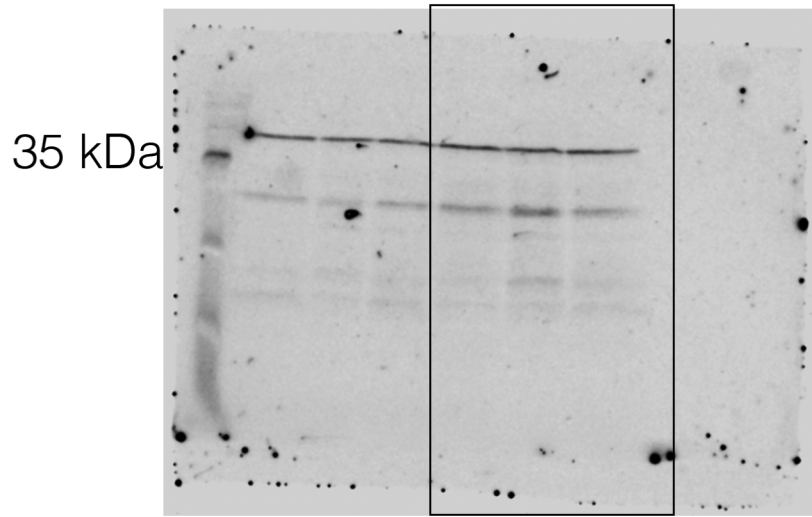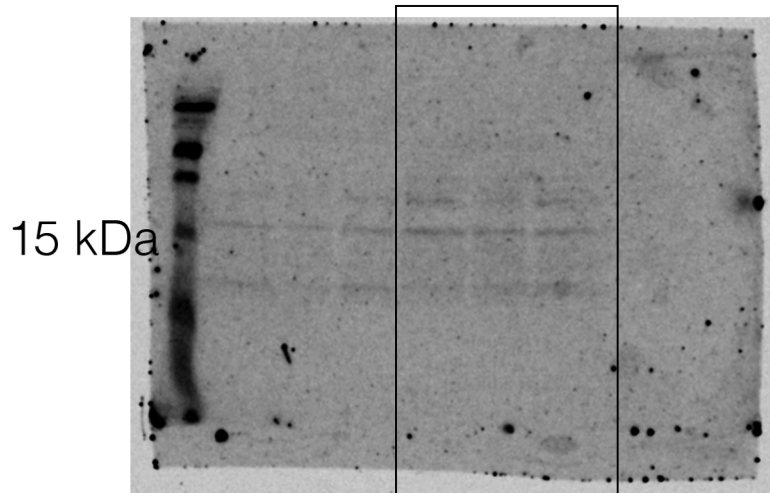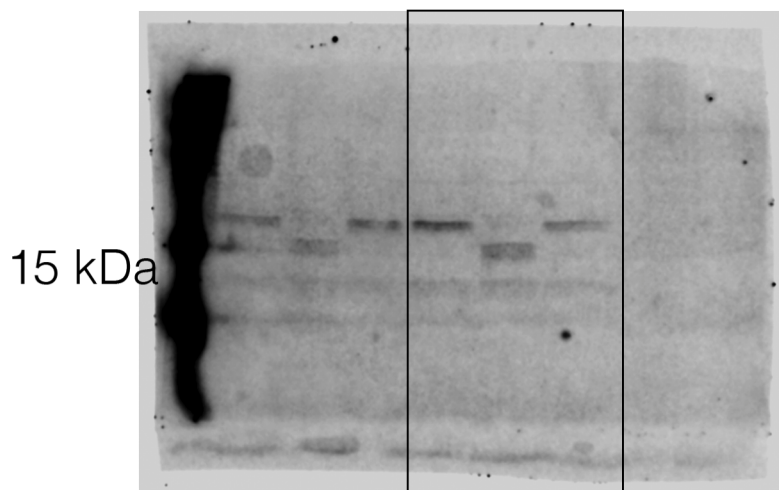

**Supplementary Figure 12.** Uncropped immunoblots for Supplementary Fig 4C. Lanes from main figure are shown within rectangle. Membrane was stripped and reprobbed for target proteins sharing similar molecular weights.
